# Supplementary material for: Self-assembly synthesis of a high-content sulfonic acid group functionalized ordered mesoporous polymer-based solid as a stable and highly active acid catalyst
Source: Royal Society of Chemistry journal article supplement (doi:10.1039/c2jm32894a), 2012-01-01

## Electronic Supplementary Information

### **Self-assembly Synthesis of High-content Sulfonic Acid Group Functionalized Ordered Mesoporous Polymer-based solid as a Stable and Highly Active Acid Catalyst**

**Wei Wang, Xin Zhuang, Qingfei Zhao and Ying Wan\***

*Key Laboratory of Resource Chemistry of Ministry of Education, Shanghai Key Laboratory of Rare Earth Functional Materials, and Department of Chemistry, Shanghai Normal University, Shanghai 200234, P. R. China;. Fax: 86 21 6432 2511; Tel: 86 21 6432 2511; E-mail: ywan@shnu.edu.cn*

### **Synthesis of carbon precursors.**

The carbon precursors, low-molecular-weight, soluble phenolic resins, were prepared from phenol and formaldehyde in a base-catalyzed process. In a typical procedure, 8.0 g of phenol was melted at 42-45 °C in a flask and mixed with 0.34 g of 20 wt% sodium hydroxide (NaOH) aqueous solution under stirring. After 10 min, 5.24 g of formalin (37 wt% formaldehyde) was added. Then the mixture was heated to 70 °C. Upon further stirring for 1 h at this temperature, the mixture was cooled to room temperature. The pH value was adjusted with 2 M HCl solution until it reached a value of ~7.0. Subsequently, water was removed by vacuum evaporation below 45 °C. The water- and ethanol-soluble phenolic resins were then dissolved in ethanol (20 wt%) for further use.

**SI Table S1.** The preparation conditions for sulfonic acid group functionalized ordered mesoporous polymer-based materials.

| Sample                      | MPTMS<br>(g) | TEOS<br>(g) | Resol<br>(g) | F127<br>(g) | H <sub>2</sub> O <sub>2</sub> /sample<br>(g/g) |
|-----------------------------|--------------|-------------|--------------|-------------|------------------------------------------------|
| MP-SO <sub>3</sub> H-13.5   | 0.654        | 3.458       | 0.32         | 2.0         | 30                                             |
| MP-SO <sub>3</sub> H-22.7   | 1.308        | 2.792       | 0.32         | 4.0         | 30                                             |
| MP-SO <sub>3</sub> H-27.4   | 1.964        | 2.08        | 0.32         | 4.4         | 30                                             |
| MP-SO <sub>3</sub> H-27.4-w | 1.964        | 2.08        | 0.32         | 4.4         | 2.04                                           |
| MP-SO <sub>3</sub> H-11.4*  | 0.654        | 3.458       | 2.0          | 3.2         | 30                                             |
| MP                          | 0            | 4.16        | 0.32         | 2.0         | 0                                              |

**SI Table S2.** The conditions for acetalization reactions.

| Entry | Catalyst                                  | Ketone<br>/aldehyde | Diol           | Temperature<br>(°C) | Time<br>(h) |
|-------|-------------------------------------------|---------------------|----------------|---------------------|-------------|
| 1     | MP-SO <sub>3</sub> H-22.7                 | acetophenone        | glycol         | 90                  | 8           |
| 2     | MP-SO <sub>3</sub> H-13.5                 | cyclohexanone       | glycol         | 100                 | 2           |
| 3     | MP-SO <sub>3</sub> H-22.7                 | cyclohexanone       | glycol         | 100                 | 2           |
| 4     | MP-SO <sub>3</sub> H-27.4                 | cyclohexanone       | glycol         | 100                 | 2           |
| 5     | MP                                        | cyclohexanone       | glycol         | 100                 | 12          |
| 6     | MP-SO <sub>3</sub> H-22.7                 | butyraldehyde       | 1,4-butanediol | 90                  | 2           |
| 7     | MP-SO <sub>3</sub> H-22.7                 | propionaldehyde     | 1,4-butanediol | 90                  | 2           |
| 8     | MP-SO <sub>3</sub> H-22.7                 | cyclohexanone       | 1,4-butanediol | 100                 | 3           |
| 9     | MCM-SO <sub>3</sub> H                     | butyraldehyde       | 1,4-butanediol | 90                  | 2           |
| 10    | MCM-SO <sub>3</sub> H                     | cyclohexanone       | 1,4-butanediol | 100                 | 3           |
| 11    | SBA-SO <sub>3</sub> H                     | butyraldehyde       | 1,4-butanediol | 90                  | 2           |
| 12    | SBA-SO <sub>3</sub> H                     | cyclohexanone       | 1,4-butanediol | 100                 | 3           |
| 13    | MSiO <sub>2</sub> -SO <sub>3</sub> H-19.4 | butyraldehyde       | 1,4-butanediol | 90                  | 2           |

**SI Figure S1.** *t*-plot analysis for ordered mesoporous polymer-based acidic solids with different sulfonic acid group contents.

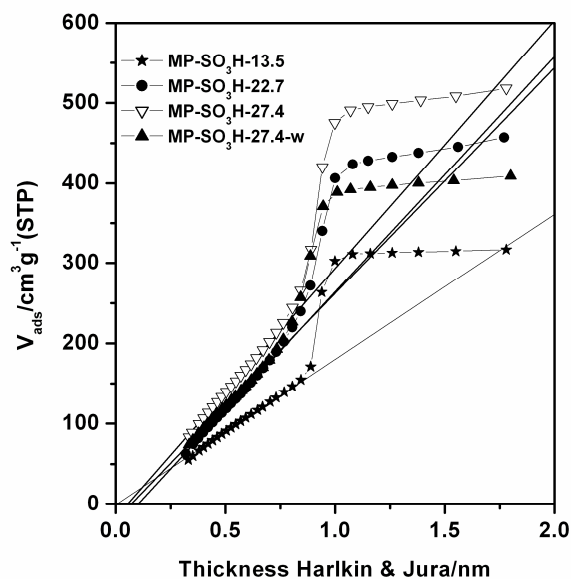

**SI Figure S2.** XPS spectrum of the mercapto-functionalized mesoporous polymer-based material MP-SO<sub>3</sub>H-27.4 before oxidation. Only one strong peak with the binding energy around 163.8 eV in the 2p<sub>3/2</sub> level is observed, demonstrating the presence of thiol group.

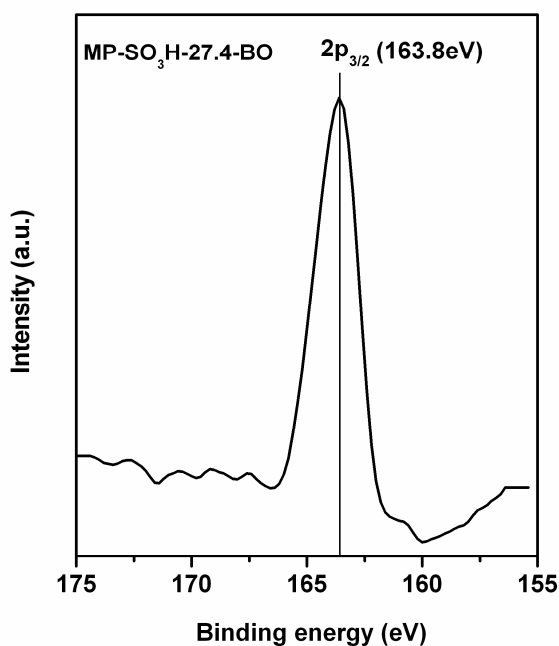

**SI Figure S3.** FT-IR spectrum for the mesoporous carbon-based product MP-SO<sub>3</sub>H-22.7(600) obtained by heating MP-SO<sub>3</sub>H-22.7 at 600 °C under protection of nitrogen.

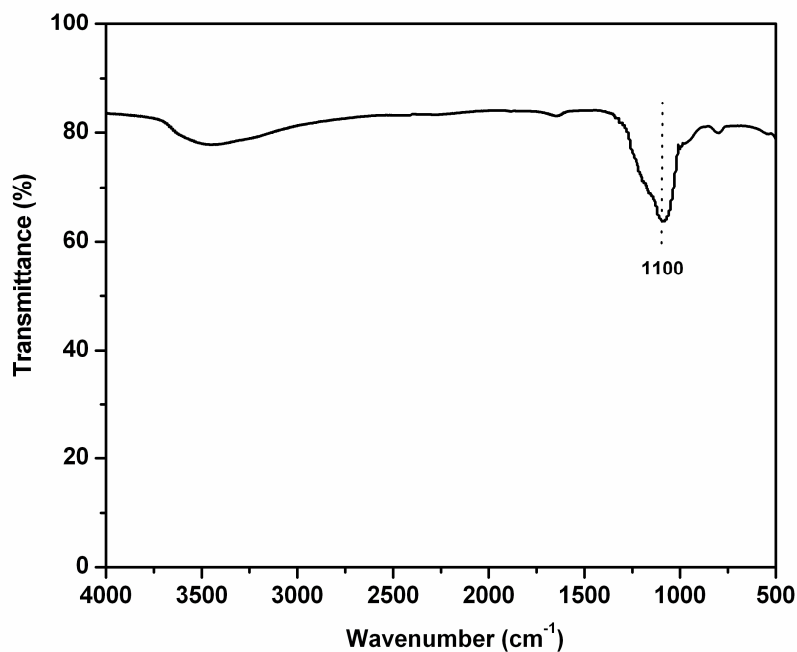

**SI Figure S4.** Small-angle XRD pattern for the mesoporous carbon-based product MP-SO<sub>3</sub>H-22.7(600) obtained by heating MP-SO<sub>3</sub>H-22.7 at 600 °C under protection of nitrogen.

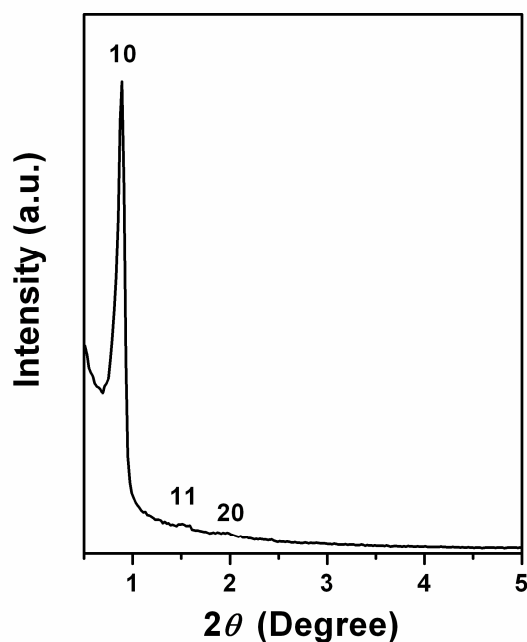

**SI Figure S5.** Small-angle XRD pattern for the mesoporous polymer-based acidic solid  $\text{MP-SO}_3\text{H-11.4}^*$  synthesized *via* the evaporation induced self-assembly of triblock copolymer F127, low-polymerized phenolic resins, TEOS and MPTMS (initial 8.11 mmol TEOS and 1.89 mmol MPTMS): 1.0 g phenolic resins), and the sample heated at 600 °C under protection of nitrogen  $\text{MP-SO}_3\text{H-11.4}^*(600)$ .

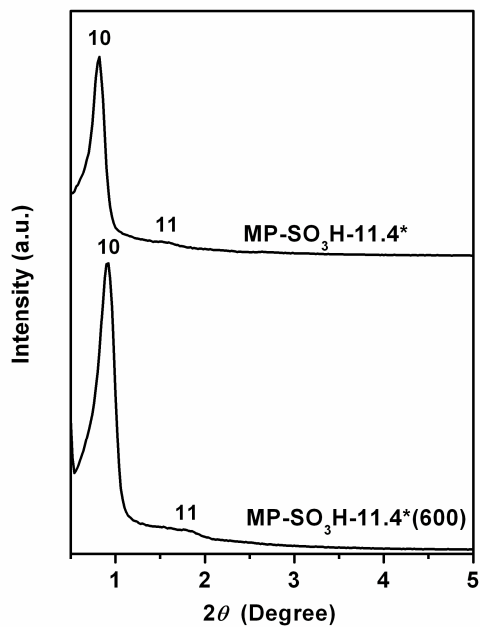

**SI Figure S6.** N<sub>2</sub> sorption isotherms for the mesoporous polymer-based acidic solid  $\text{MP-SO}_3\text{H-11.4}^*$ , and the sample heated at 600 °C under protection of nitrogen  $\text{MP-SO}_3\text{H-11.4}^*(600)$ .

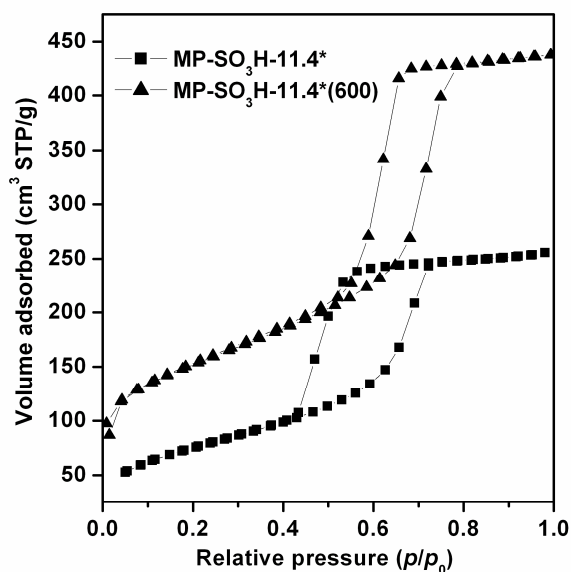

**SI Figure S7.** Small-angle XRD pattern for the mesoporous carbon product after dissolution of silica component from MP-SO<sub>3</sub>H-11.4\*(600).

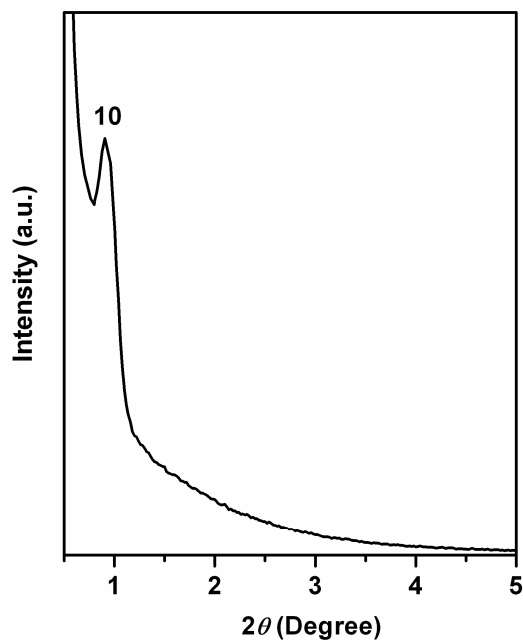

**SI Figure S8.** (a) N<sub>2</sub> sorption isotherms and (b) pore-size distribution curve for the mesoporous carbon product after dissolution of silica component from MP-SO<sub>3</sub>H-11.4\*(600).

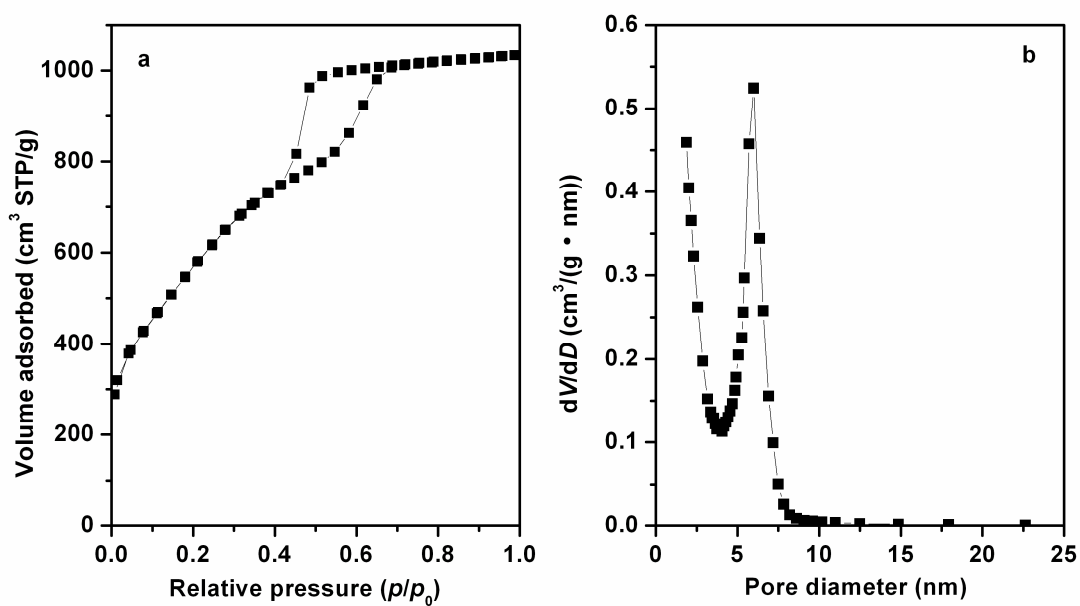

Supplement: c2jm32894a.pdf [file c2jm32894a.pdf]
